# Supplementary material for: Morphological Structure and Distribution of Hairiness on Different Body Parts of Apis mellifera with an Implication on Pollination Biology and a Novel Method to Measure the Hair Length
Source: MDPI journal article supplement (doi:10.3390/insects13020189), 2022-02-11
Supplement: s1 [file s1]

## Supplementary Materials

**Table S1:** Summary of data including minimum values, 1<sup>st</sup> quartile, median, mean, 3<sup>rd</sup> quartile, and maximum value of hair length and number of branches among the whole body parts.

| Hair length |          | Number of branches |       |
|-------------|----------|--------------------|-------|
| Min.        | 8.91 mm  | Min.               | 0.00  |
| 1st Qu.     | 17.81mm  | 1st Qu.            | 4.240 |
| Median      | 22.43 mm | Median             | 27.00 |
| Mean        | 22.27 mm | Mean               | 5.225 |
| 3rd Qu.     | 26.66 mm | 3rd Qu.            | 6.240 |
| Max.        | 39.60 mm | Max.               | 8.060 |

**Table S2:** Statistical outputs of ANOVA analyzing differences in hair length and the number of branches first with all body parts and then with three body parts (dorsal thorax, ventral thorax, face).

| Body parts      | Hair length |        |                            | Number of branches |        |                            |
|-----------------|-------------|--------|----------------------------|--------------------|--------|----------------------------|
|                 | DF          | F      | <i>p</i> value             | DF                 | F      | <i>p</i> value             |
| All body parts  | 19          | 10.318 | $2.20 \times 10^{-16}$ *** | 14                 | 4.203  | $7.53 \times 10^{-6}$ ***  |
| Face and thorax | 2           | 22.634 | $1.69 \times 10^{-6}$ **** | 2                  | 8.6136 | $1.28 \times 10^{-3}$ ***  |
| Legs            | 14          | 8.9945 | $1.19 \times 10^{-13}$ *** | 9                  | 3.1433 | $3.38 \times 10^{-3}$ **** |

\*\*\*:  $p \leq 0.001$

**Table S3:** Correlation coefficients (Pearson *r*) of hair length and number of branches (dorsal thorax, ventral thorax, face)

| Body part       | r value         |
|-----------------|-----------------|
| All             | $r = 0.51$ ***  |
| Face and thorax | $r = 0.58$ **** |
| Legs            | $r = 0.54$ **** |

\*\*\*:  $p \leq 0.001$
